# Supplementary material for: Symptoms of Burnout Syndrome among Physicians during the Outbreak of COVID-19 Pandemic—A Systematic Literature Review
Source: Healthcare (Basel). 2022 May 25;10(6):979. doi: 10.3390/healthcare10060979 (PMC9223230; doi:10.3390/healthcare10060979)
Supplement: Supplementary file 1 [file healthcare-10-00979-s001.zip › healthcare-1691568-File S1.pdf]

**Table S1:** The articles included in the review.

| Author, Year              | Country      | Study design          | Sample                              | Burnout prevalence                                                                                              | Main results                                                                                                                                                                                                                                                                                                                                                                                                                                                                                       | Burnout Scale                        |
|---------------------------|--------------|-----------------------|-------------------------------------|-----------------------------------------------------------------------------------------------------------------|----------------------------------------------------------------------------------------------------------------------------------------------------------------------------------------------------------------------------------------------------------------------------------------------------------------------------------------------------------------------------------------------------------------------------------------------------------------------------------------------------|--------------------------------------|
| Abdelhafiz et al, 2020    | Egypt        | Cross-sectional study | 220 physicians                      | Burnout frequency among the research group was 36.36%.                                                          | Burnout development was raised two times with the need to buy personal protective equipment and was less likely to develop in doctors with older age. Male gender was a predictor of Depersonalization (D), and female gender was significantly related to higher Emotional Exhaustion (EE) - was correlated with infection or death from COVID-19 among colleagues or relatives. Professional Achievement (PA) was low because of infection or death from COVID-19 among colleagues or relatives. | Maslach Burnout Inventory<br>MBI-HSS |
| Abdelghani et al, 2020    | Egypt        | Cross-sectional study | 320 physicians                      | For burnout symptoms, high EE, high D, and low PA were reported by 20, 71, and 39% of physicians, respectively. | COVID-19 virus infection was positively associated with anxiety, depression, EE, and D symptoms, and negatively correlated with PA and all quality-of-life domains.                                                                                                                                                                                                                                                                                                                                | MBI                                  |
| Al-Humadi et al, 2021     | U.S.A.       | Cross-sectional study | 225 residents/<br>fellow physicians | 19.6% prevalence of burnout                                                                                     | Female physicians registered less work-life balance and a high level of burnout, which was negatively associated with age and positively associated with a history of depression or anxiety and the number of times on call                                                                                                                                                                                                                                                                        | MBI                                  |
| Alrawashdeh et al, 2021   | Jordan       | Cross-sectional study | 973 physicians                      | The prevalence of burnout was 57.7%                                                                             | Female gender, working at highly loaded hospitals, working for long hours, doing night shifts, insufficient access to personal protective equipment, and being positively tested for SARS-CoV-2 were positively associated with burnout.                                                                                                                                                                                                                                                           | BMS – short version                  |
| Alwashmi & Alkamees, 2021 | Saudi Arabia | Cross-sectional study | 101 physiatrists                    | 80.2% of the participants experienced burnout which was correlated with scoring high on the EE and/or the D.    | Physiatrists who work in tertiary centres are more likely to experience burnout. Physiatrists in-training and with less experience are more likely to experience burnout. Female physiatrists are more likely to experience burnout. Burnout was statistically not significant in relation to stress, anxiety, or depression.                                                                                                                                                                      | MBI-HSS                              |
| Appiani et al, 2021       | Argentina    | Cross-sectional study | 302 physicians                      | The prevalence of burnout syndrome was 73.5 %                                                                   | Physicians who had a positive score were significantly younger. Burnout was associated with having less seniority, being a resident, carrying for patients with potential or confirmed COVID-19 infection, having COVID-19-like symptoms, and working 24-hour shifts. Burnout, anxiety, and depression were significantly higher among residents and physicians working in the emergency department.                                                                                               | MBI                                  |

|                      |           |                       |                  |                                                                                                                                                                                                                                                                                                |                                                                                                                                                                                                                                                                                                                                                                                                                                                                                                                                                                                                                                                                                                                                      |                                    |
|----------------------|-----------|-----------------------|------------------|------------------------------------------------------------------------------------------------------------------------------------------------------------------------------------------------------------------------------------------------------------------------------------------------|--------------------------------------------------------------------------------------------------------------------------------------------------------------------------------------------------------------------------------------------------------------------------------------------------------------------------------------------------------------------------------------------------------------------------------------------------------------------------------------------------------------------------------------------------------------------------------------------------------------------------------------------------------------------------------------------------------------------------------------|------------------------------------|
| Asghar et al, 2021   | Pakistan  | Cross-sectional study | 87 physicians    | EE was observed in 54% of participants. D was observed in 77%. Low PA was reported in 31% of the participants. D, EE, and low PA were associated significantly with a history of COVID-19 infection and COVID-19 postings                                                                      | EE was higher in residents, in those who worked in COVID-19 units and were infected with COVID-19, and in those who were unmarried. EE and D were higher in those with lower mental well-being scores, with PA directly proportional to mental well-being. Mental well-being was associated significantly with COVID-19 infection and PA. D was reported more frequently in residents, in those who worked in COVID-19 units and in those infected with COVID-19, regardless of gender or relationship status. PA was observed to be lower in both interns and residents, in those posted in COVID-19 units, in those infected with COVID-19, and in those who were unmarried.                                                       | MBI-HSS                            |
| Baptista et al, 2021 | Portugal  | Cross-sectional study | 214 physicians   | 3 dimensions: 65.9% for personal burnout 68.7% for work-related burnout 54.7% for patient-related burnout                                                                                                                                                                                      | A strong association was found between gender, years of professional experience, depression and anxiety, and burnout levels. Participants reported levels of depression (67.3%), anxiety (69.6%), and stress (61.7%). Being a female was significantly associated with higher odds of patient-related burnout. Less experience was also significantly associated with higher odds of patient-related burnout. A reduction in the monthly income was significantly and inversely correlated with patient-related burnout. High levels of depression were significantly associated with higher levels of all 3 burnout dimensions. Higher levels of anxiety were also significantly associated with higher levels of personal burnout. | Copenhagen Burnout Inventory (CBI) |
| Vila et al, 2022     | Argentina | Prospective study     | 39 cardiologists | Third year residents were the group with the highest incidence of burnout (66.6%), followed by fourth year residents of whom (50%) met the same criteria, and second year residents (40%), affected by burnout syndrome.                                                                       | There was no identified significant difference in the prevalence of burnout syndrome between both groups according to sex and year of residence.                                                                                                                                                                                                                                                                                                                                                                                                                                                                                                                                                                                     | MBI                                |
| Buran & Altin, 2021  | Turkey    | Cross-sectional study | 67 physicians    | The EE score was significantly higher in physicians worrying too much about malpractice. PA was significantly higher in physicians feeling the need for training in the medico-legal field. EE score was lower in subspecialist attending physicians, compared to general attending physicians | The EE score was significantly higher in physicians exposed to violence. The notable significance of burnout was related to physicians' anxiety on medico-legal issues and exposure to violence.                                                                                                                                                                                                                                                                                                                                                                                                                                                                                                                                     | MBI                                |

|                      |                |                       |                              |                                                                                                                                                                                                                                                                                                                              |                                                                                                                                                                                                                                                                                                                                                                                                                                                                          |                                                |
|----------------------|----------------|-----------------------|------------------------------|------------------------------------------------------------------------------------------------------------------------------------------------------------------------------------------------------------------------------------------------------------------------------------------------------------------------------|--------------------------------------------------------------------------------------------------------------------------------------------------------------------------------------------------------------------------------------------------------------------------------------------------------------------------------------------------------------------------------------------------------------------------------------------------------------------------|------------------------------------------------|
| Civantos et al, 2020 | Brazil         | Cross-sectional study | 349 physicians               | 21.8% of the participants                                                                                                                                                                                                                                                                                                    | Anxiety 47.9%, Distress, 60.2%, Depressive symptoms 10.6%. Female physicians were more likely to report burnout                                                                                                                                                                                                                                                                                                                                                          | Mini-Z burnout assessment                      |
| Civantos et al, 2020 | U.S.A.         | Cross-sectional study | 163 physicians               | 14.7% burnout                                                                                                                                                                                                                                                                                                                | Anxiety, distress and depression were reported in (45.5%), (26.3%), (21.8%), and (16%) physicians, respectively. Attending had decreased burnout relative to residents. Females had increased levels of burnout and distress. Physicians in states with greater than 20 000 positive cases had increased distress.                                                                                                                                                       | Mini-Z burnout assessment                      |
| Chalhub et al, 2021  | Brazil         | Cross-sectional study | 223 frontline physicians     | All physicians on the frontline experienced at least moderate symptoms of burnout.                                                                                                                                                                                                                                           | Physicians with anxiety showed more EE, depersonalization, less PA with anxiety had higher scores in EE, D domains and lower scores in PA.                                                                                                                                                                                                                                                                                                                               | MBI                                            |
| Cravero et al, 2021  | 21 countries   | Cross-sectional study | 1420 trainees                | 66% of the trainees who cared for patients with COVID-19 reported burnout, for both EE and D.                                                                                                                                                                                                                                | Compared with trainees who did not take care of patients with COVID-19, those who took care of 1–30 patients, 31–60 patients and > 60 patients were increasingly more likely to report burnout.                                                                                                                                                                                                                                                                          | Two validated single-item measures of EE and D |
| de Wit et al, 2020   | Canada         | Mixed methods study   | 468 emergency physicians(EM) | Burnout levels did not significantly change over time                                                                                                                                                                                                                                                                        | Being tested for COVID-19 in the previous week and the number of shifts worked were associated with high EE. Having been tested for COVID-19 was also associated with high D.                                                                                                                                                                                                                                                                                            | MBI                                            |
| Dinibutun, 2020      | Turkey         | Cross-sectional study | 200 physicians               | EE level was medium. The levels of D and PA were low. Level of total burnout was low.                                                                                                                                                                                                                                        | Burnout levels of males and females and married and single physicians were similar. The EE level of 18-23-year-old physicians was lower than the rest of the physicians. Physicians' level of satisfaction with their income is not effective on burnout. The burnout level of physicians who did not choose their profession willingly was determined to be higher. The burnout level of physicians who were actively involved in the fight against COVID-19 was lower. | MBI                                            |
| Doherty et al, 2021  | Ireland        | Cross-sectional study | 144 seniors and specialists  | 77% screened positive for burnout                                                                                                                                                                                                                                                                                            | 64% reported that Covid-19 has had an adverse effect on their mental health. 47% of respondents screened positive using cynicism or detachment. 50.9% reported regular feelings of reduced professional ability or accomplishment. 68% reported feeling physically exhausted regularly.                                                                                                                                                                                  | 2-item Maslach Burnout Scale (MBS-2)           |
| Faria et al, 2021    | Paraiba Brazil | Cross-sectional study | 126 physicians               | EE – for frontline doctors (high for 50% of the participants, moderate for 39% and low for 11%); for off-frontline doctors (high for 18.2% of the participants, moderate for 68, 2% and low for 13.6 %).<br>D – for frontline physicians (high for 37.8% of the participants, moderate for 54.9% and low for 7.3%); for off- | Burnout was associated with younger age (24-33 years), not having children, working on the front line, working in the COVID-19 ICU, being on duty, and having contracted COVID-19.                                                                                                                                                                                                                                                                                       | MBI-HSS                                        |

|                          |           |                                                         |                           |                                                                                                                                                                                                                                                                                    |                                                                                                                                                                                                                                                                                                                                                                                                                                                                                                                                                                                                                                                                                                                                                                                  |                                                  |
|--------------------------|-----------|---------------------------------------------------------|---------------------------|------------------------------------------------------------------------------------------------------------------------------------------------------------------------------------------------------------------------------------------------------------------------------------|----------------------------------------------------------------------------------------------------------------------------------------------------------------------------------------------------------------------------------------------------------------------------------------------------------------------------------------------------------------------------------------------------------------------------------------------------------------------------------------------------------------------------------------------------------------------------------------------------------------------------------------------------------------------------------------------------------------------------------------------------------------------------------|--------------------------------------------------|
|                          |           |                                                         |                           | frontline doctors (high for 2.3% of the participants, moderate for 79.5%; for 18.2 % was low).<br>PA – for frontline physicians (high for 64.6%, moderate for 32.9% and low for 2.4 %.) For off-frontline doctors (47.7% was high, as well as for moderate level and low for 4.5%) |                                                                                                                                                                                                                                                                                                                                                                                                                                                                                                                                                                                                                                                                                                                                                                                  |                                                  |
| Guercovich et al, 2021   | Argentina | Cross-sectional study                                   | 188 oncologists           | 25% of the subjects had high levels of D, 39.9% reported high levels of EE, and 53.7% reported low levels of PA.                                                                                                                                                                   | 25% of subjects reported high levels of D, 39.9% reported high levels of EE, and 53.7% reported low levels of PA.                                                                                                                                                                                                                                                                                                                                                                                                                                                                                                                                                                                                                                                                | MBI – Spanish version                            |
| Jha et al, 2020          | U.S.A.    | Observational, prospective non-comparative study design | 100 physicians            | (52%) of the physicians felt burnt out. Top three reasons contributed for the state of exhaustion and were attributed to financial stress (23%), administrative burden (11%), and uncertainty (12%)                                                                                | 67% of the physicians responded that in-house billing was responsible for their increased level of burnout. 73% of the physicians responded that electronic medical records (EMRs) were one of the causes. Overall, 78% were very concerned.                                                                                                                                                                                                                                                                                                                                                                                                                                                                                                                                     | 32-question survey                               |
| Kannampallil et al, 2020 | U.S.A.    | Cross-sectional study                                   | 393 physicians - trainees | The exposed group had a higher prevalence of burnout (46.3% vs. 33.7%)                                                                                                                                                                                                             | The exposed group to patients who were being tested for COVID-19 experienced moderate to extremely high perceived stress regarding childcare (61.7% vs. 39.2%), reported considerably lower work-family balance (sometimes or often, 68.2% vs. 55.4%) and more difficulty in taking time off for attending to personal or family matters (somewhat or very hard, 74.1% vs. 47.7%), had a higher prevalence of stress (29.4% vs. 18.9%), and burnout (46.3% vs. 33.7%); higher prevalence of anxiety (21.6% vs. 14.9%). The exposed and non-exposed group had similar prevalence of depression (28% vs. 26.3%). Both groups had low professional fulfilment from their current clinical work activities (25.2% vs. 25.9%). Usage of wellness resources by trainees was low (5 %). | Stanford Professional Fulfilment Index (PFI)     |
| Kase et al, 2022         | U.S.A.    | Cross-sectional study                                   | 499 paediatricians        | Higher BO scores were significantly associated with higher compassion fatigue score, emotional depletion.                                                                                                                                                                          | Besides compassion fatigue, other significant predictors of burnout were the feeling of „Self care is not a priority for me” and emotional depletion. At the opposite pole, “My institution has valued my contribution to the Covid-19 crisis” was associated with lower burnout scores”                                                                                                                                                                                                                                                                                                                                                                                                                                                                                         | CFST                                             |
| Khalafallah et al, 2020  | U.S.A.    | Cross-sectional study                                   | 407 neurosurgeons         | The rate of burnout among respondents was 20.4 %                                                                                                                                                                                                                                   | Burnout was associated with working in a hostile or difficult environment (COVID-19), not having children, being in practice for 5-15 years, spending increased time conducting non-neurosurgical medical care because of COVID-19, feeling uncertain about future earnings due to COVID-19, choosing not to pursue or feeling uncertain about pursuing neurosurgery again.                                                                                                                                                                                                                                                                                                                                                                                                      | The abbreviated Maslach Burnout Inventory (aMBI) |

|                             |        |                       |                         |                                                                                                                                                                                                                                                                      |                                                                                                                                                                                                                                                                                                                                                                                                  |                                              |
|-----------------------------|--------|-----------------------|-------------------------|----------------------------------------------------------------------------------------------------------------------------------------------------------------------------------------------------------------------------------------------------------------------|--------------------------------------------------------------------------------------------------------------------------------------------------------------------------------------------------------------------------------------------------------------------------------------------------------------------------------------------------------------------------------------------------|----------------------------------------------|
| Khan et al, 2021            | Canada | Cross-sectional study | 302 physicians          | The prevalence of burnout was 68% (EE - 63%, D - 39% and PA - 22%)                                                                                                                                                                                                   | Women were more likely to report EE and feel low PA. Visible ethnic minority physicians were more likely to report feeling lower personal accomplishment than white physicians. Physicians who reported that COVID-19 affected their burnout were more likely to report any burnout and consideration of quitting or quitting.                                                                   | MBI                                          |
| Lazarides et al, 2021       | U.S.A. | Cross-sectional study | 63 orthopaedic surgeons | Personal fulfilment (42.8%)<br>Burnout - (15.9%)                                                                                                                                                                                                                     | There was no relationship between burnout or professional fulfilment and gender.                                                                                                                                                                                                                                                                                                                 | MBI                                          |
| Lou et al, 2021             | U.S.A. | Cross-sectional study | 301 trainees            | 52% of the trainees who reported being burned out were concerned about missed educational opportunities, as compared to 42% in the non-burned-out group. Professional fulfilment was not significantly associated with concern for missed educational opportunities. | Trainees assigned to education at home had 2.85 greater odds of being concerned over missed educational opportunities as compared to trainees performing clinical work. Trainees performing research were not similarly affected. Trainees in pathology or radiology had greater odds of concern for missed educational opportunities as compared to trainees in medicine.                       | Stanford Professional Fulfilment Index (PFI) |
| Macía-Rodríguez et al, 2021 | Spain  | Cross-sectional study | 1015 internists         | 58.3% presented high EE; 61.5% had a high level of D; 67.6% reported low PA; 40.1% presented with the 3 criteria described, and therefore burn-out syndrome.                                                                                                         | Burnout syndrome was independently related to the management of patients with SARS-CoV-2, the lack of availability of personal protective equipment, increased responsibility, not having received financial compensation for overtime work, not having rested after 24-hour shifts, not having had holidays in the previous 6 months, consumption of sleeping pills, and higher alcohol intake. | MBI                                          |
| Mendonça et al, 2021        | Brazil | Cross-sectional study | 3071 medical residents  | Burnout (55.2%) among fourth-year residents and (55.1%) among second-year residents.                                                                                                                                                                                 | Depressive symptoms were the most common among second-year residents (70.5%), followed by anxiety symptoms (56.0%).                                                                                                                                                                                                                                                                              | OLBI                                         |

|                         |                   |                                            |                                              |                                                                                                                                                                                                                                                              |                                                                                                                                                                                                                                                                                                                                                                                                                                                                                                                                                                                                                                                                                                                                                                                                                                                                                     |                                                                |
|-------------------------|-------------------|--------------------------------------------|----------------------------------------------|--------------------------------------------------------------------------------------------------------------------------------------------------------------------------------------------------------------------------------------------------------------|-------------------------------------------------------------------------------------------------------------------------------------------------------------------------------------------------------------------------------------------------------------------------------------------------------------------------------------------------------------------------------------------------------------------------------------------------------------------------------------------------------------------------------------------------------------------------------------------------------------------------------------------------------------------------------------------------------------------------------------------------------------------------------------------------------------------------------------------------------------------------------------|----------------------------------------------------------------|
| Nguyen et al, 2021      | U.S.A.            | Cross-sectional study                      | 166 emergency physicians (EM)                | Burnout was reported by 74.7% of the respondents                                                                                                                                                                                                             | Physicians who felt there was inadequate institutional support were dissatisfied with patient care resources. Physicians expressing job dissatisfaction were more likely to report feelings of burnout. There was reported an association between burnout and age (being younger), as well as gender. The highest proportions of reported burnout were those between 41 and 50 years of age; those in the oldest age group, 71–75, reported burnout in the lowest proportions. Of the physicians reporting burnout, 70.2% were white, 67.7% were male, 34.7% were employed at community teaching hospitals, 46.8% have been in practice for >20 years, and 37.1% were in the Southern US. The most common feelings associated with burnout were increased work-related emotional strain and anxiety, followed by isolation from family and friends, and then by increased workload. | MBI-HSS                                                        |
| Ofei-Dodoo et al, 2021  | U.S.A.            | Cross-sectional study                      | 113 family physicians                        | 50.4% of the respondents reported manifestations of burnout                                                                                                                                                                                                  | The physicians who personally treated any presumptive or confirmed COVID-19 patients were more likely to report at least one manifestation of burnout, experience EE, and feel a higher level of personal stress.                                                                                                                                                                                                                                                                                                                                                                                                                                                                                                                                                                                                                                                                   | 2 single-item measures of EE and D adapted from the full (MBI) |
| Park et al, 2020        | Republic of Korea | Cross-sectional study                      | 115 physicians                               | Burnout reported 90.4%                                                                                                                                                                                                                                       | Similar burnout scores between the sexes. Female physicians tended to report depression, anxiety, and stress more frequently than males and a higher proportion of were found to endorse EE.                                                                                                                                                                                                                                                                                                                                                                                                                                                                                                                                                                                                                                                                                        | MBI-HSS                                                        |
| Rodriguez et al, 2021   | U.S.A.            | Cross-sectional study                      | 426 EM physicians                            | Reported higher levels of EE/burnout since the pandemic started                                                                                                                                                                                              | Most physicians (90.8%) reported changing their behaviour toward family and friends, especially by decreasing signs of affection (76.8%). The most cited measures referred to alleviate stress/anxiety were increasing.                                                                                                                                                                                                                                                                                                                                                                                                                                                                                                                                                                                                                                                             | 32 Likert-type scale                                           |
| Seda-Gombau et al, 2021 | Spain             | Multicentre longitudinal descriptive study | 40 physicians responded to the three surveys | In January 2019, 10% of primary care physicians scored high on all burnout domains. In October 2020, this percentage increased to 50%. Unprecedented worsening due to the pandemic: EE, which already affected 55% of primary care physicians, jumped to 77% | Being older increases the chances of having burnout. Significant variable was sleep; specifically, individuals not sleeping well scored on average. The lack of sleep was significant for EE.                                                                                                                                                                                                                                                                                                                                                                                                                                                                                                                                                                                                                                                                                       | MBI-HSS                                                        |
| Tuna & Özdin, 2021      | Turkey            | Descriptive study                          | 406 physicians                               | Physicians working in COVID units had higher levels of D. PA was low among research assistants and in participants working in university research hospitals.                                                                                                 | Female gender, lack of COVID training, difficulty obtaining protective equipment, working in a COVID unit, and current psychiatric disease predicted desensitization.                                                                                                                                                                                                                                                                                                                                                                                                                                                                                                                                                                                                                                                                                                               | MBI                                                            |

|                 |        |                       |                                     |                                                                                                                                                                                                                                                                                                                                                |                                                                                                                                                                                                                                                                                                                                                                                                                                                                                                                                                                                                                                                                                                                                                                                                                                    |                             |
|-----------------|--------|-----------------------|-------------------------------------|------------------------------------------------------------------------------------------------------------------------------------------------------------------------------------------------------------------------------------------------------------------------------------------------------------------------------------------------|------------------------------------------------------------------------------------------------------------------------------------------------------------------------------------------------------------------------------------------------------------------------------------------------------------------------------------------------------------------------------------------------------------------------------------------------------------------------------------------------------------------------------------------------------------------------------------------------------------------------------------------------------------------------------------------------------------------------------------------------------------------------------------------------------------------------------------|-----------------------------|
| Yao et al, 2021 | U.S.A. | Cross-sectional study | 870 physicians - breast oncologists | Amongst the COVID-19 related burnout emotions, EE was reported with the highest frequency (33.6%), "anxious" was the second most common and "burnout" was the third most common. Physician anxiety, sleep disturbance and COVID-19 related burnout were significantly associated with demographic factors, including COVID-19 testing factors. | Mean anxiety and COVID-19 burnout scores were significantly higher among physicians whose patients experienced either delays in surgery, adjuvant chemotherapy, radiation, breast imaging or specialty consultation. Anxiety and COVID-19 related burnout were significantly associated with physician age, gender and years in practice, and sleep disturbance was significantly associated with physician age. There were no significant differences in physician anxiety, sleep disturbance and COVID-19 related burnout between different facility locations, practice settings or physician specialty type. Physicians who took care of COVID-19 positive patients reported significantly higher anxiety, sleep disturbance and COVID-19 related burnout than physicians who did not take care of COVID-19 positive patients. | 6 COVID-19 burnout emotions |
|-----------------|--------|-----------------------|-------------------------------------|------------------------------------------------------------------------------------------------------------------------------------------------------------------------------------------------------------------------------------------------------------------------------------------------------------------------------------------------|------------------------------------------------------------------------------------------------------------------------------------------------------------------------------------------------------------------------------------------------------------------------------------------------------------------------------------------------------------------------------------------------------------------------------------------------------------------------------------------------------------------------------------------------------------------------------------------------------------------------------------------------------------------------------------------------------------------------------------------------------------------------------------------------------------------------------------|-----------------------------|
